# Supplementary material for: Synthesis, Conformational Analysis and Antitumor Activity of the Naturally Occurring Antimicrobial Medium-Length Peptaibol Pentadecaibin and Spin-Labeled Analogs Thereof
Source: MDPI journal article supplement (doi:10.3390/ijms241713396), 2023-08-29
Supplement: s1 [file s1]

# Synthesis, Conformational Analysis and Antitumor Activity of the Naturally Occurring Antimicrobial Medium-Length Peptaibol Pentadecaibin and Spin-Labeled Analogs Thereof

Laura Morbiato <sup>1</sup>, Celeste Quaggia <sup>1</sup>, Luca Menilli <sup>2</sup>, Chiara Dalla Torre <sup>1</sup>, Antonio Barbon <sup>1</sup> and Marta De Zotti <sup>1,\*</sup>

<sup>1</sup> Department of Chemical Sciences, University of Padova, 35131 Padova, Italy; laura.morbiato.1@unipd.it (L.M.); celeste.quaggia@studenti.unipd.it (C.Q.); chiara.dallatorre.2@studenti.unipd.it (C.D.T.); antonio.barbon@unipd.it (A.B.)

<sup>2</sup> Department of Biology, University of Padova, 35131 Padova, Italy; luca.menilli@unipd.it

\* Correspondence: marta.dezotti@unipd.it; Tel.: +39-049-827-5280

## TABLE OF CONTENTS

1. HR-ESIMS spectra and a HPLC chromatogram of the crude peptides (figures S1-S5)
2. cw-EPR spectra (figure S6)
3. HPLC profiles and HR-ESIMS and <sup>1</sup>H NMR spectra for the new peptide sequences synthesized in the present work (figures S7-S12)
4. Biotage purification procedure for To1-VX (figure S13)

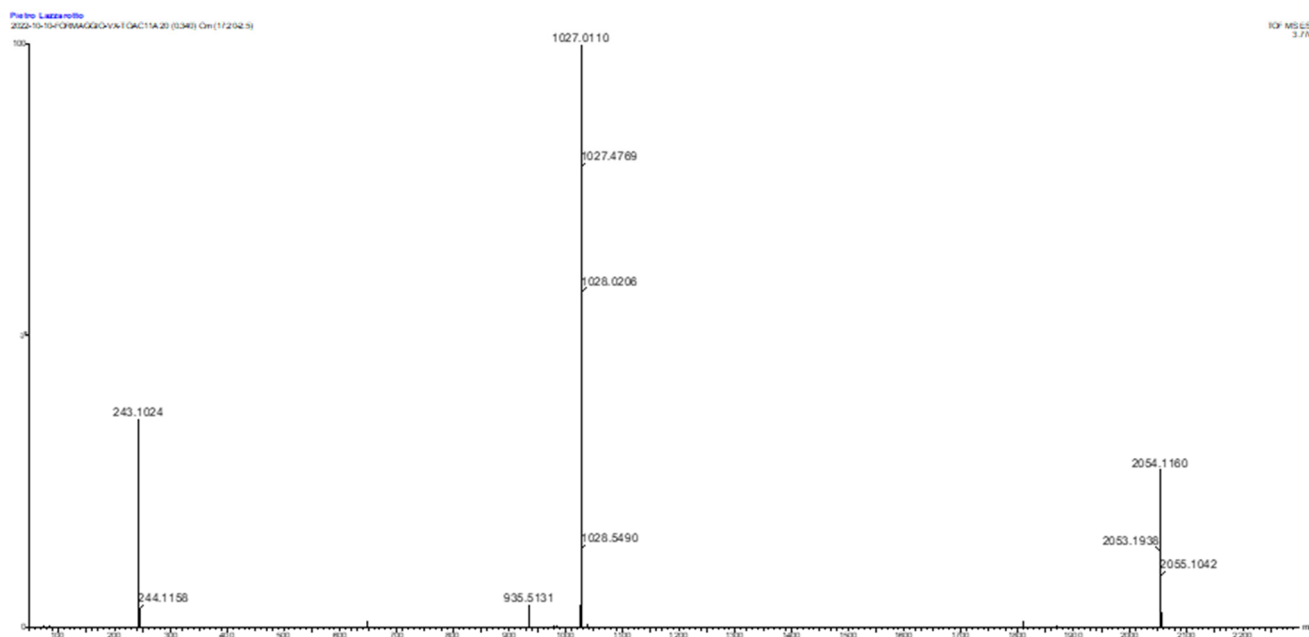

Figure S1. High Resolution Mass Spectrum (HRMS) acquired for [Gln(Trt)]To11-VX after cleavage from the resin with HFIP 30% in  $\text{CH}_2\text{Cl}_2$  (DCM) for 1 hour.  $[\text{MW}_{\text{calcd}}:2052,14]$   $[(\text{M}+\text{H})^+]_{\text{found}}=2053,1936$  m/z  $[(\text{M}+2\text{H})^{2+}]_{\text{found}}=1027,0110$  m/z. MW TrtH = 243.1.

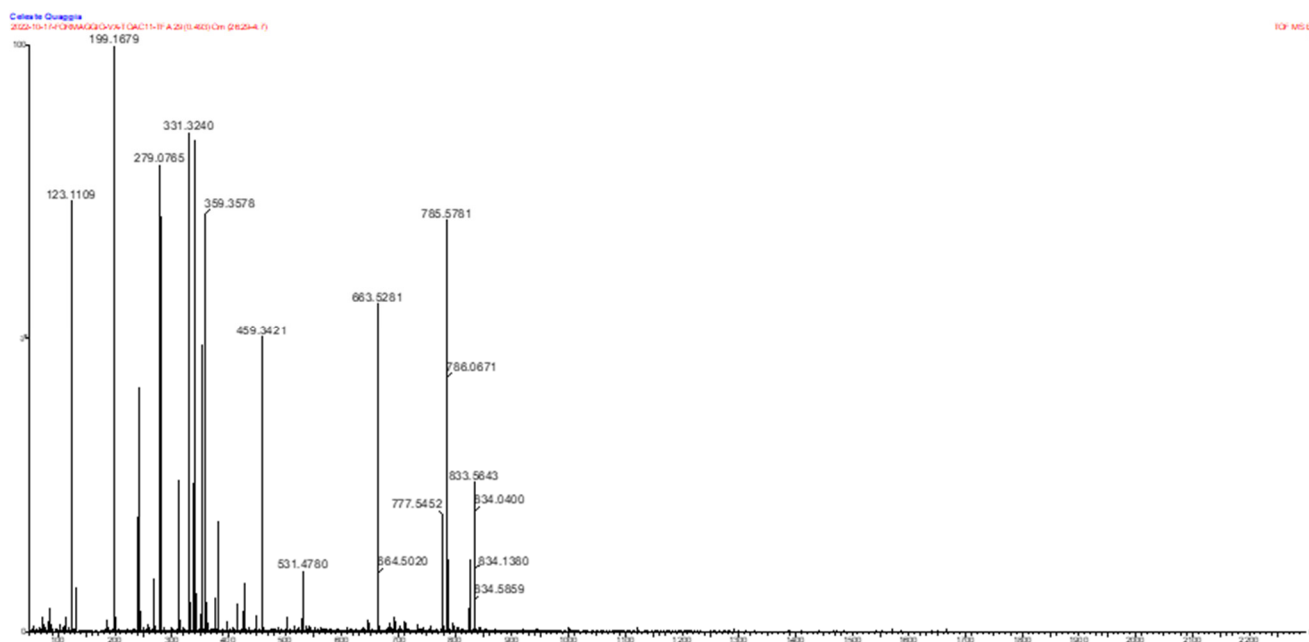

Figure S2: HRMS spectrum of the crude mixture of figure S1 after treatment with 20% TFA in DCM for 2 h 30 min.  $[\text{MW}_{\text{calc}}=1568.92]$ ;  $[(\text{M}+2\text{H})^{2+}]_{\text{found}}=785,5781$  m/z

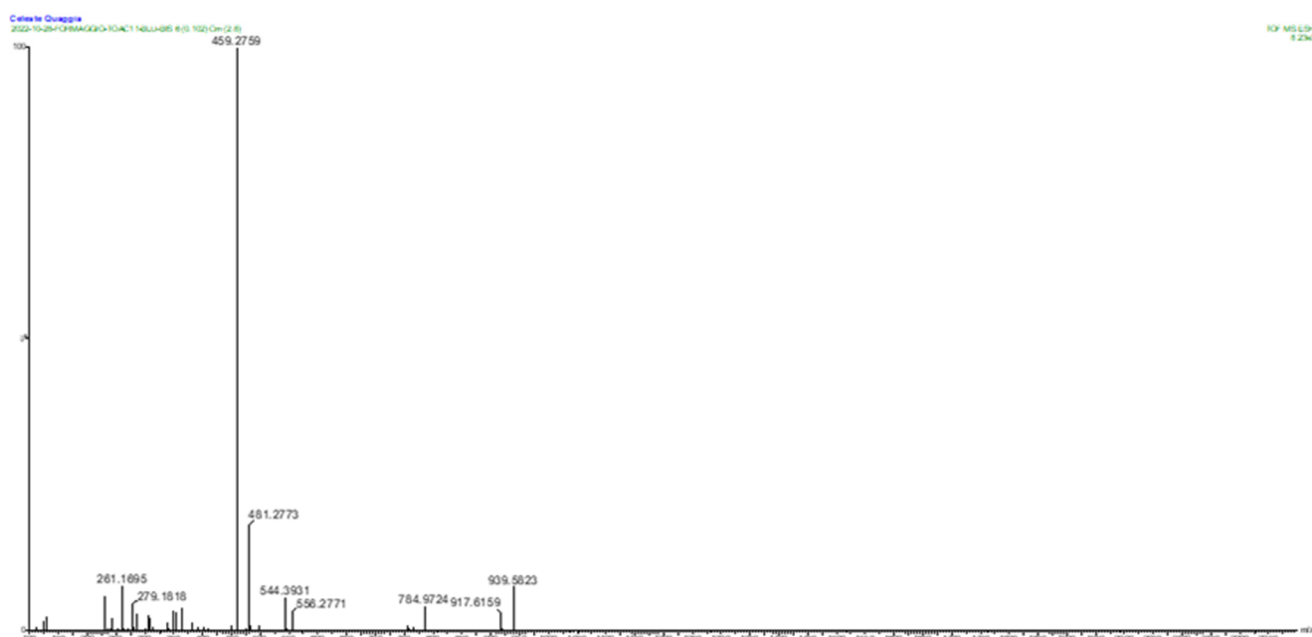

Figure S3: HRMS spectrum of the crude mixture of figure S1 after treatment with 10% TFA, 2,5%TIS and 2,5% H<sub>2</sub>O for 16 hours.

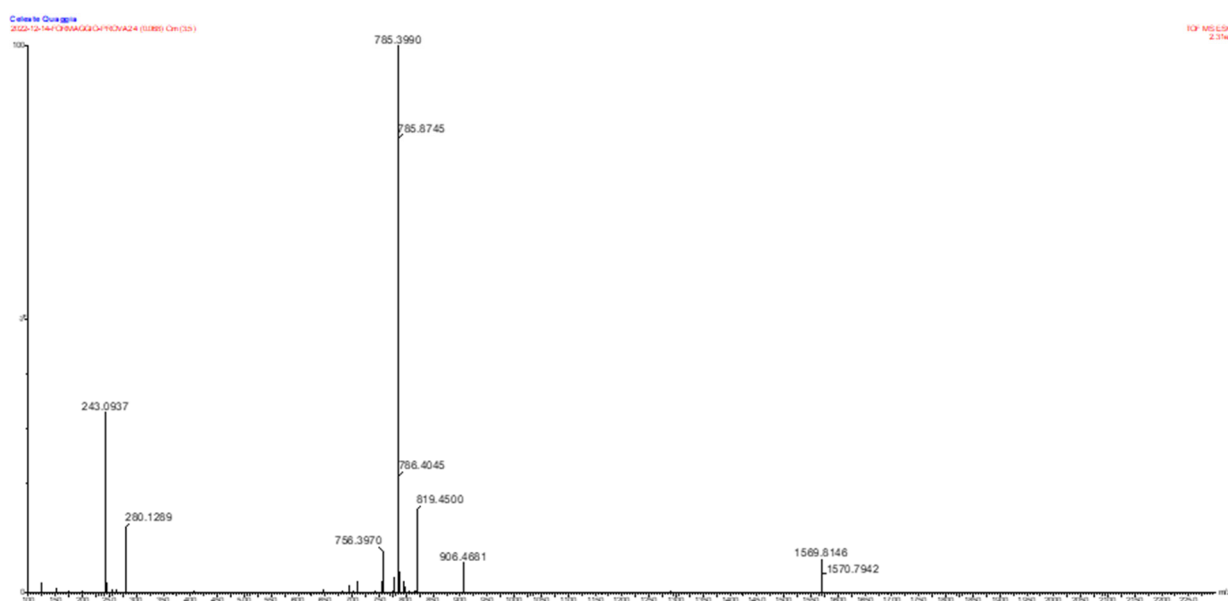

Figure S4: HRMS spectrum of the crude mixture of figure S1 after treatment with 5% TFA, 2,5%TIS, for 7 hours.  $[MW_{\text{calcd}}:1568,92]$ .  $[M+H]^+_{\text{found}}=1569,8146 \text{ m/z}$ ;  $[M+2H]^{2+}_{\text{found}}= 785,3990 \text{ m/z}$ ;  $[M-58]^{2+}_{\text{found}}= 756,3970 \text{ m/z}$ .

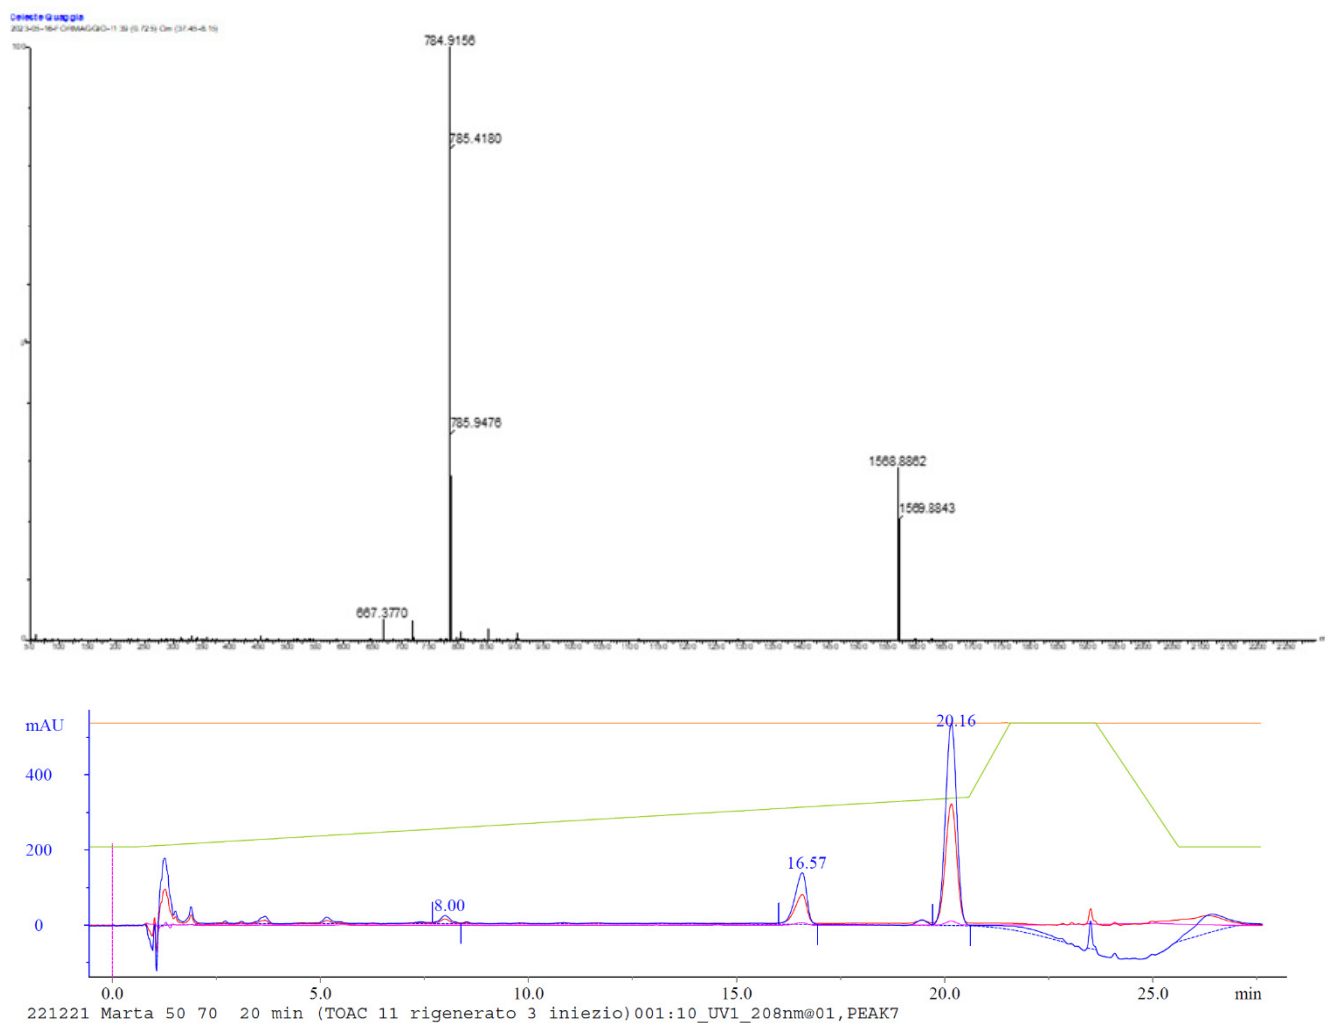

Figure S5. Representative HR-ESIMS spectrum and HPLC chromatogram (gradient: 50-70%B in 22min;  $R_t$  20.16 min) of the crude product To11-VX.  $MW_{\text{calcd}} = [1567,92]$ ;  $[M+H]^+_{\text{found}} = 1568,8882 \text{ m/z}$   $[M+2H]^{2+}_{\text{found}} = 784,9156 \text{ m/z}$ . The high crude purity was achieved by using Gln with unprotected side chains.

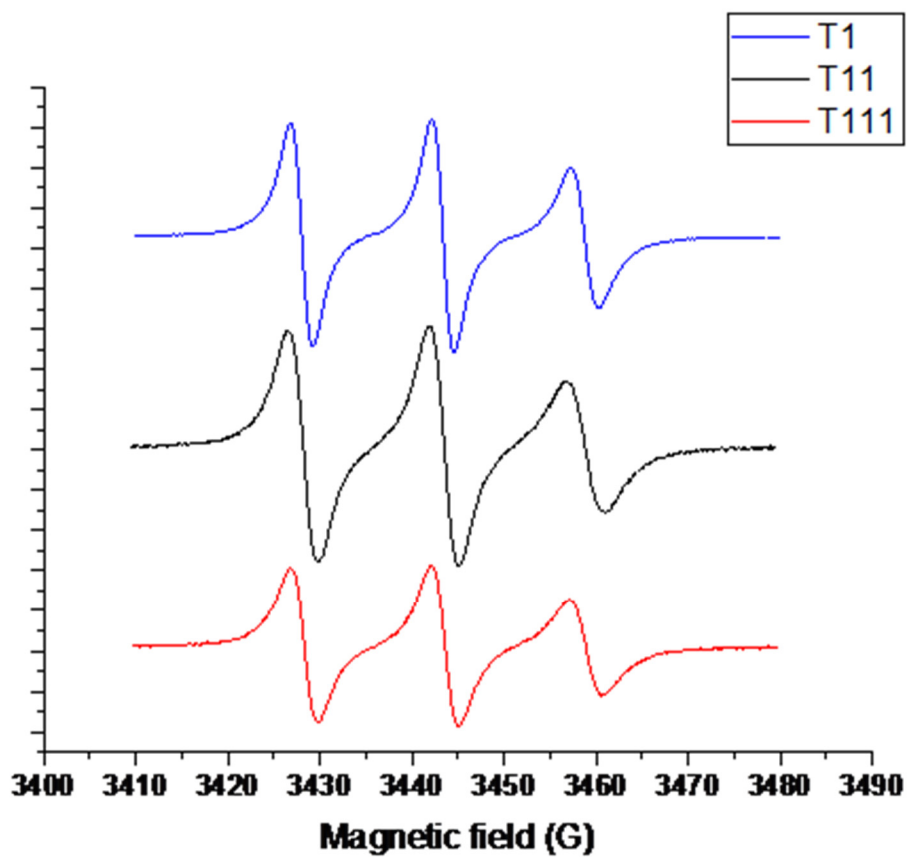

Figure S6. cw-EPR spectra of peptides: To1-VX (blue), To11-VX (black) and To1,11-VX (red), in CH<sub>3</sub>OH. Peptide concentration:  $1 \times 10^{-4}$  M.

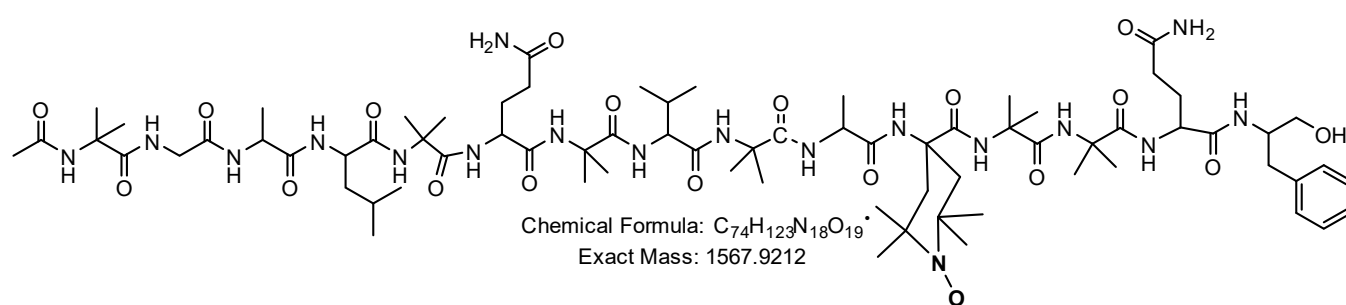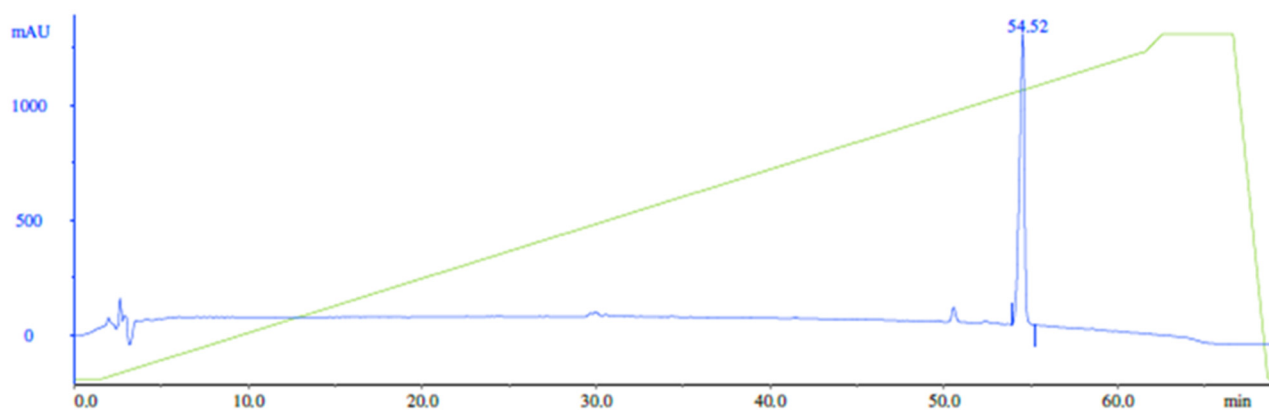

Figure S7. HPLC profile of purified To11-VX. Experimental conditions: Phenomenex  $C_{18}$  column (250x4.6mm 5 $\mu$ m). Gradient: 5-95 %B in 60 min. Purity: 94%

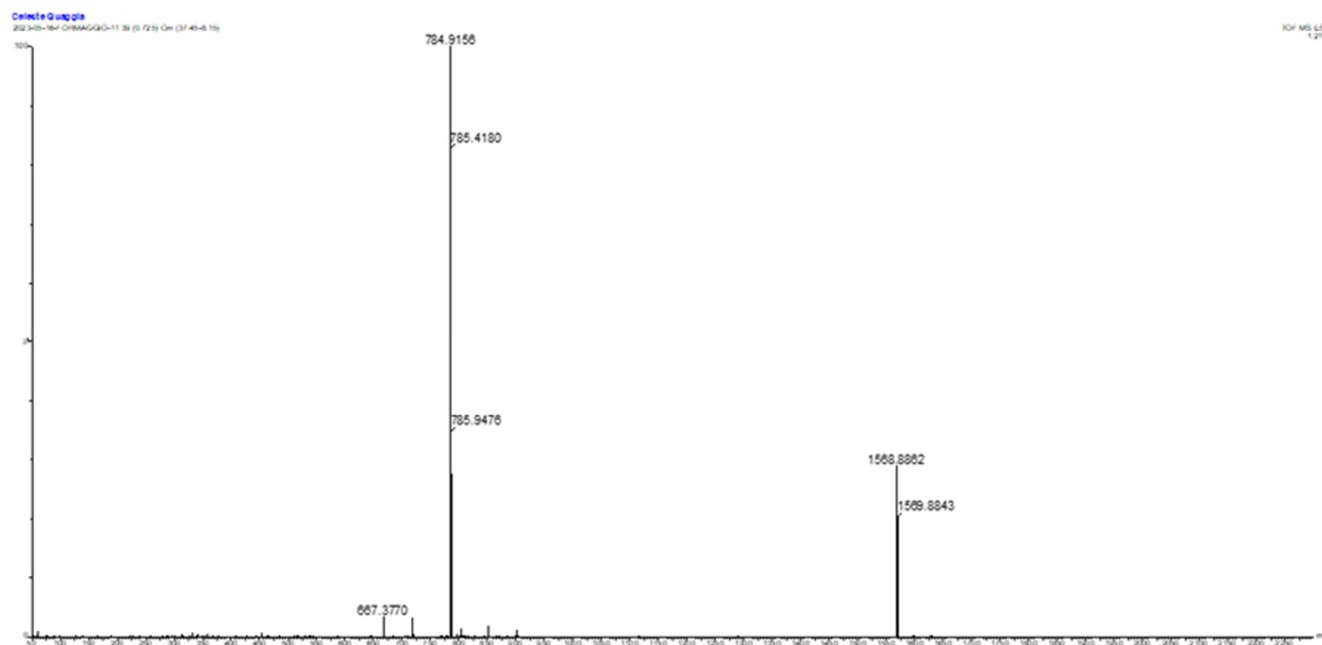

Figure S8. ESI HRMS spectrum of To11-VX.  $MW_{calc}$  1567,9212;  $[M+H]^+_{found}=1568,8862$ ;  $[M+2H]^2+_{found}=784,9156$ .

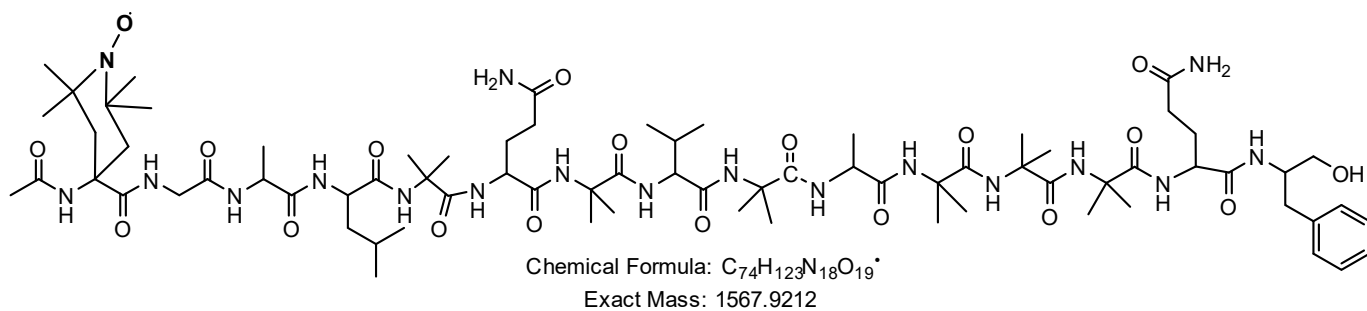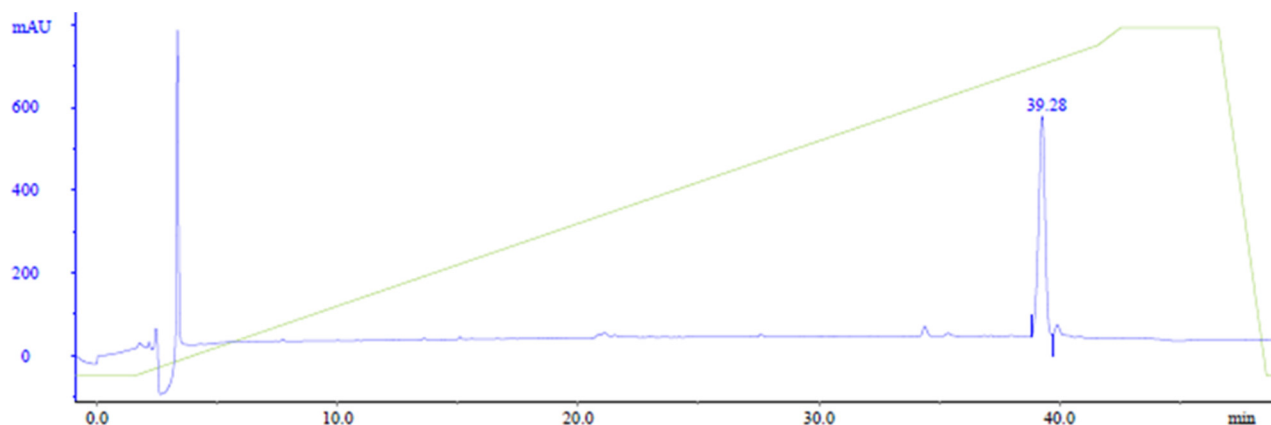

Figure S9. HPLC profile of purified To1-VX. Experimental conditions: Phenomenex  $C_{18}$  column (250x4.6mm 5 $\mu$ m); gradient: 5-95 %B in 40 min. Purity: 93%

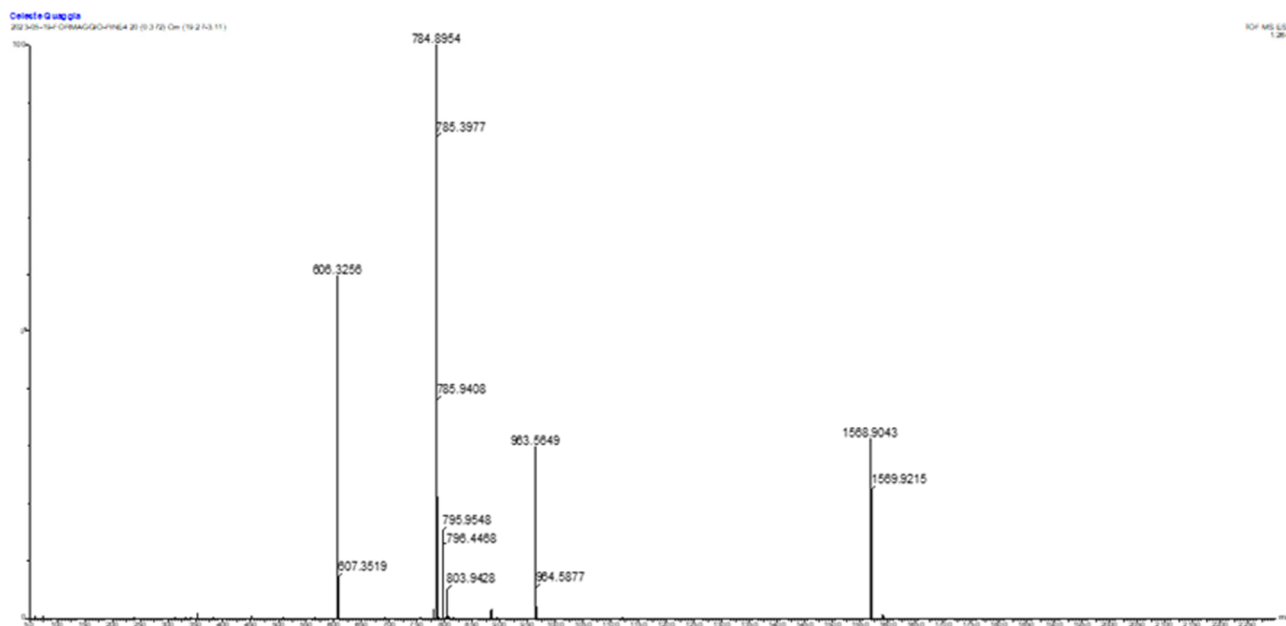

Figure S10. ESI HRMS spectrum of To1-VX.  $MW_{calc}$  1567,9212;  $[M+H]^+_{found}$  1568,9043;  $[M+2H]^{2+}_{found}$  784,8954; experimental mass fragments :605,32+962,56=1567,88.

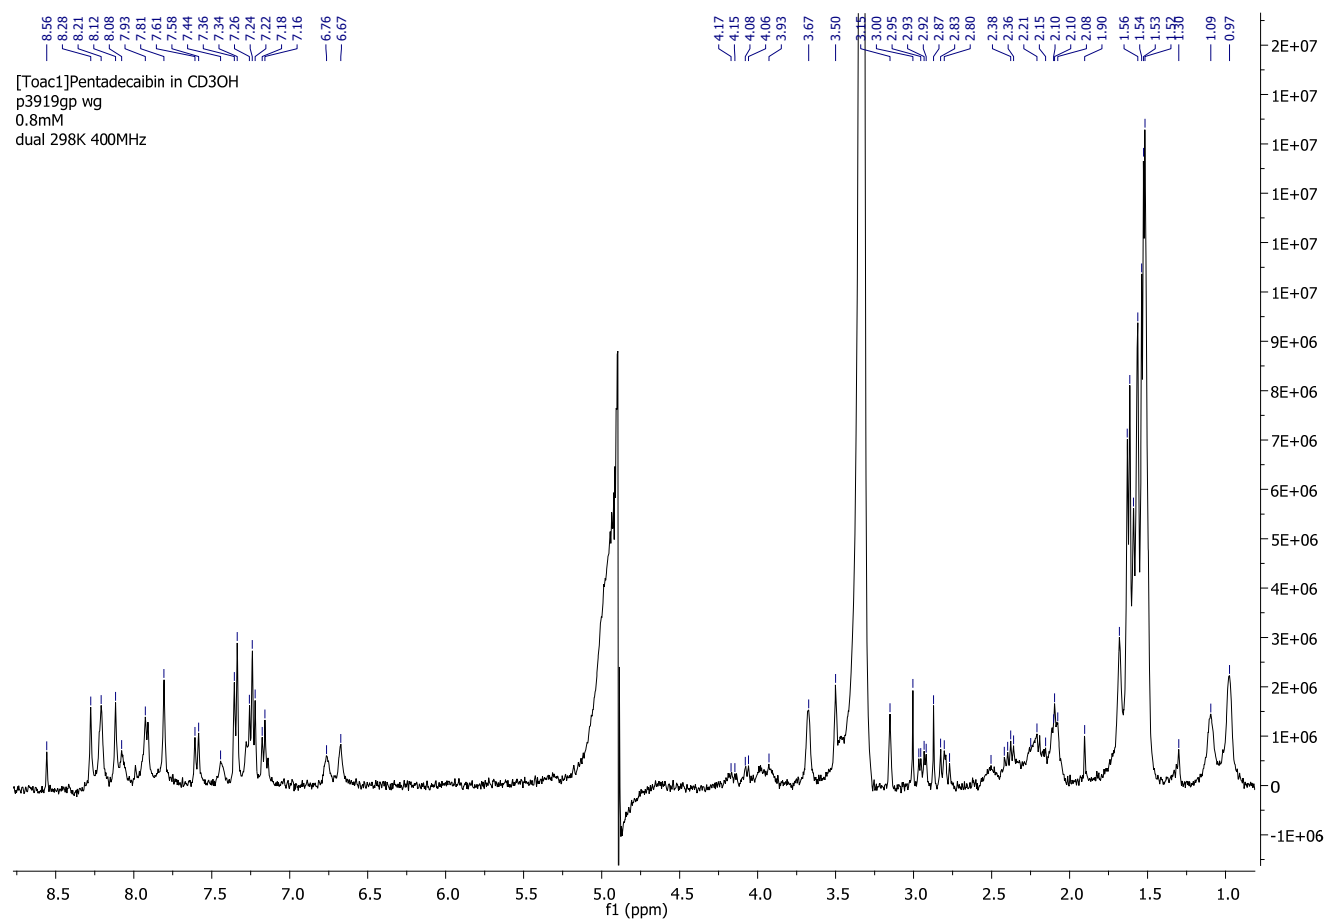

Figure S11. <sup>1</sup>H NMR spectrum of To1-VX in CD<sub>3</sub>OH. Experimental conditions: 400MHz, 298K, peptide concentration: 0.8 mM.



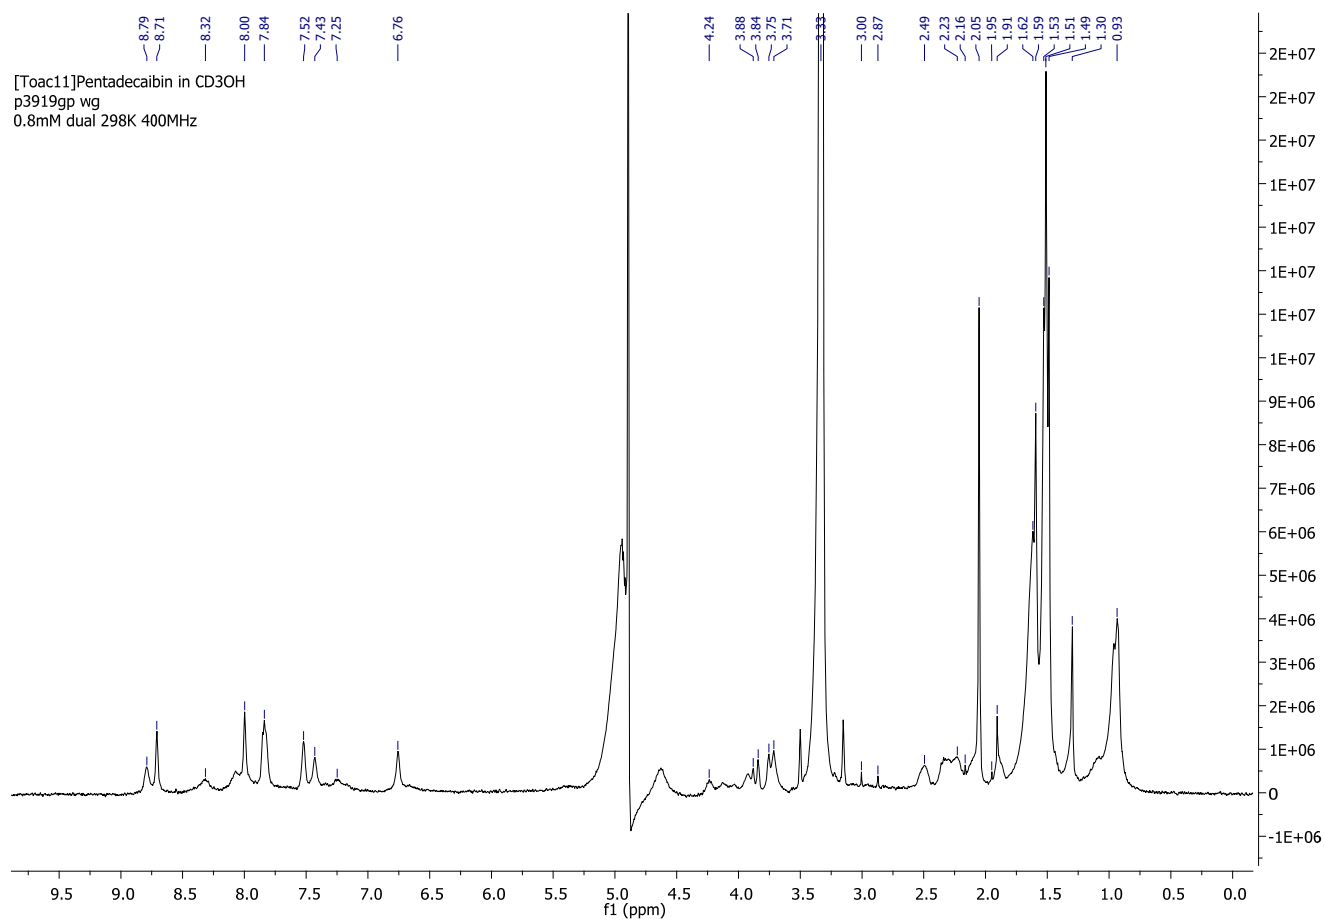

Figure S12. <sup>1</sup>H NMR spectrum of To11-VX in CD<sub>3</sub>OH. Experimental conditions: 400MHz, 298K, peptide concentration: 0.8 mM.

|                         |                            |                     |              |
|-------------------------|----------------------------|---------------------|--------------|
| <b>User</b>             | MARTA                      | <b>Cartridge</b>    | SNAP C18 12g |
| <b>Sample Name</b>      | 2023-Jan-17 12.50          | <b>Rack Type</b>    | 18x150 mm    |
| <b>Date</b>             | 2023-Jan-17 12.54          | <b>Max Fraction</b> | 25 ml        |
| <b>Method</b>           | C18 VX TOAC1<br>rigenerato | <b>Volume</b>       |              |
| <b>Detection Mode</b>   | UV1+UV2                    | <b>Solvent A</b>    | Water        |
| <b>UV1 (Collection)</b> | 206 nm                     | <b>Solvent B</b>    | Acetonitrile |
| <b>UV2 (Collection)</b> | 260 nm                     |                     |              |

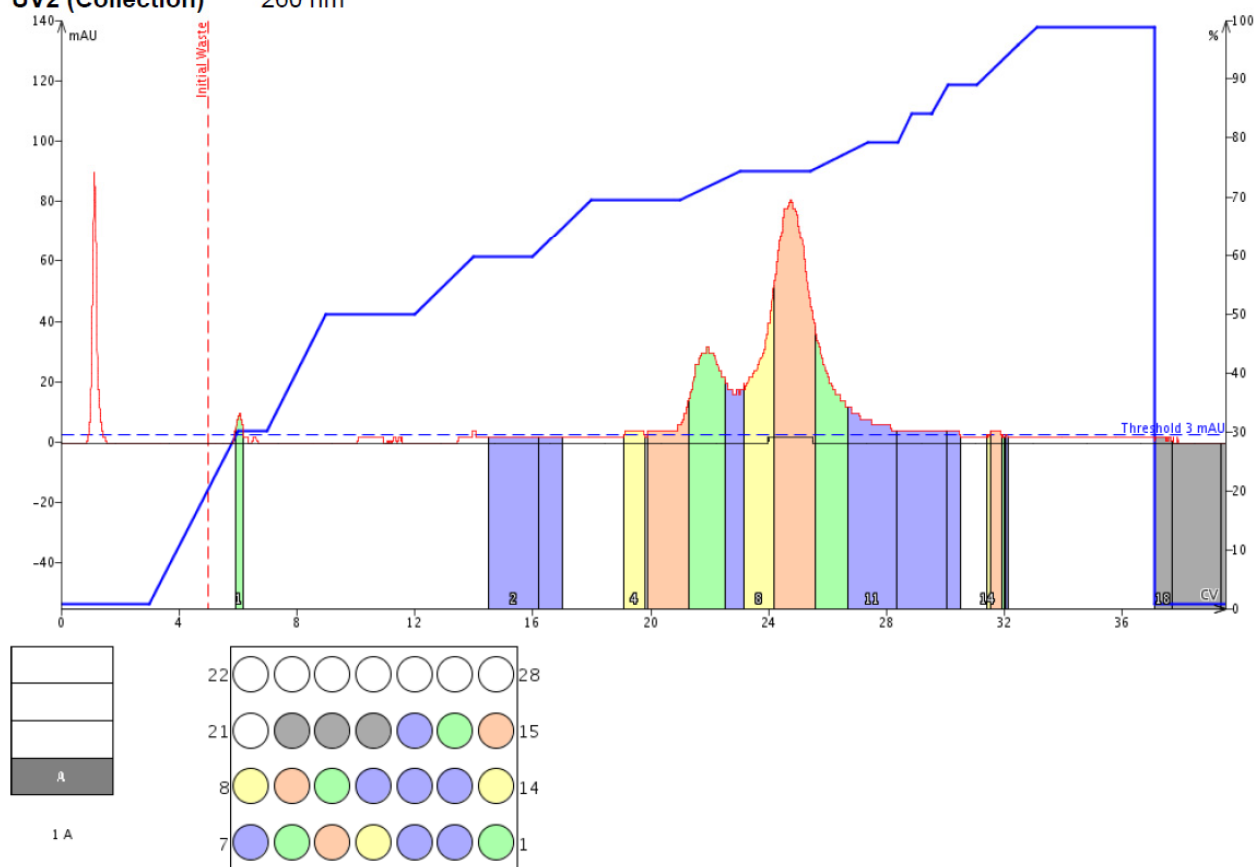

Figure S13. Report from the medium-pressure chromatographic purification performed on the crude sample of To1-VX. Biotage Isolera Prime instrument; flow rate, 12mL/min; C<sub>18</sub> Duo Sfär column (12g).
